# Supplementary material for: Total Flavonoids Extracts of Apocynum L. from the Ili River Valley Region at Different Harvesting Periods and Bioactivity Analysis
Source: MDPI journal article supplement (doi:10.3390/molecules27217343), 2022-10-28
Supplement: s1 [file s1]

# Supplementary Figure

A

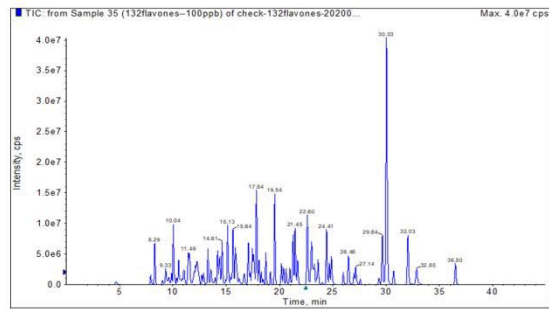

B

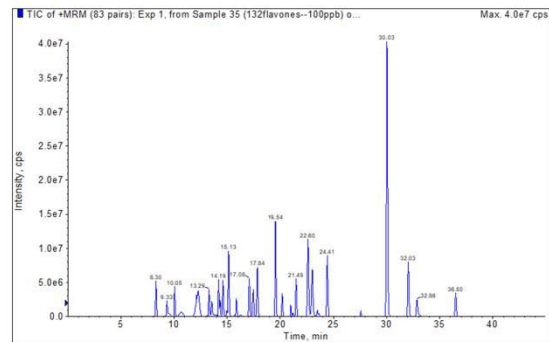

C

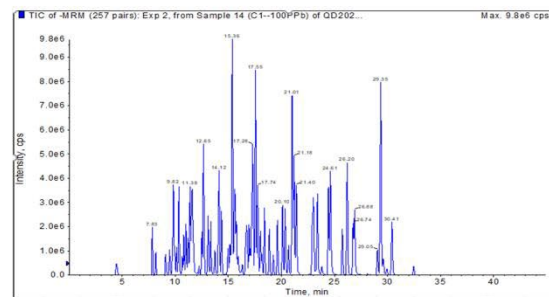

D

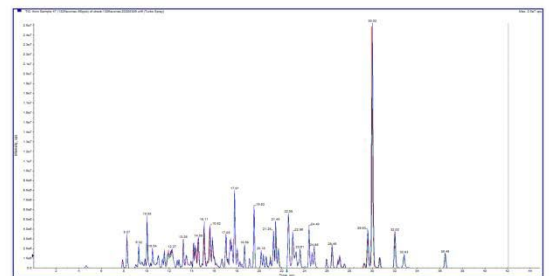

E

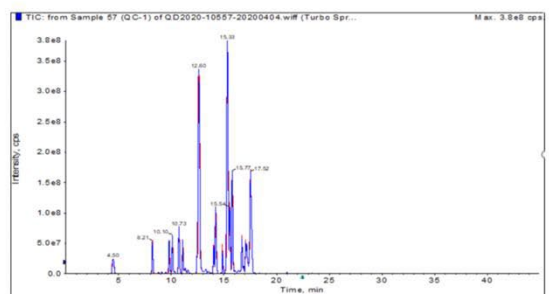

**Figure S1.** Total ions current plot for standards (**A**), TIC plot for standards in positive ionization mode (**B**), TIC plot for standards extraction in negative ionization mode (**C**), TIC overlay plot of standards (**D**), TIC overlay plot of quality control samples (**E**).
