# Supplementary material for: Total Flavonoids Extracts of Apocynum L. from the Ili River Valley Region at Different Harvesting Periods and Bioactivity Analysis
Source: Molecules. 2022 Oct 28;27(21):7343. doi: 10.3390/molecules27217343 (PMC9655940; doi:10.3390/molecules27217343)
Supplement: Supplementary file 1 [file molecules-27-07343-s001.zip › Supplementary Table S1. The Metabolites information of Apocynum venetum and Apocynum hendersonii.xlsx]

## Sheet: Sheet1
Supplementary Table S1. The Metabolites information of Apocynum venetum and Apocynum hendersonii
Metabolites	Class	AV1	AV2	AV3	AV4	AH1	AH2	AH3	AH4
3-Hydroxyflavone	Flavonols	0	0	0	0	0	0	0	0
Myricetin 3-galactoside	Flavonols	20028.6	39672	22712.5	28724.7	1518.87	3805.85	3508.73	1083.73
Narcissin	Flavonols	1994.77	140.109	35.552	500.258	0	2097.48	0	0
Glycitein	Flavonols	0	0	0	0	0	0	0	0
Kaempferol	Flavonols	303.377	617.274	306.588	517.035	293.393	466.368	432.275	1259.05
Aromadendrin	Flavonols	0	0	0	0	0	0	0	144.891
Taxifolin	Flavonols	705.824	827.594	615.144	648.926	817.344	1225.39	1342.27	1482.17
trans-3,3',4',5,5',7-Hexahydroxyflavanone	Flavonols	1860.35	6744.69	5162.55	7363.48	4318.2	4174.64	5573.25	4781.36
Apigenin 4'-O-rhamnoside	Flavonols	0.538342	0.612147	0.455186	0.48354	0.50241	0.615364	0.481315	0.547043
Cosmosiin	Flavonols	400.025	410.629	11.5237	225.985	1227.39	1599.95	1664.19	1230.42
Afzelin	Flavonols	0	0	0	0	2.2088	0	0	0
Avicularin	Flavonols	0	0	0	0	0	0	0	0
Astragalin	Flavonols	122019	124523	89644.6	67835	108235	118215	121255	99850.9
Quercitrin	Flavonols	0	0	0	0	30.7052	0	0	0
Myricitrin	Flavonols	0	0	0	0	41.3742	0	42.8441	40.8623
Quercetin 3-galactoside	Flavonols	267666	267323	303744	347484	34773.1	66042	55611.8	36987.3
Quercetin 3-O-glucuronide	Flavonols	80469.7	142.529	182.275	147.684	169687	169210	173212	161084
Isorhamnetin-3-O-glucoside	Flavonols	467.474	302.898	1018.37	128.43	3147.73	4492.23	3034.98	2732.66
Amentoflavone	Flavonols	16.1725	14.9738	15.4851	18.2984	20.2856	18.6221	14.3983	14.6459
Nicotiflorin	Flavonols	66434.5	23025.3	16891.4	14056.9	150.021	89815.3	37.0958	21.7773
Rutin	Flavonols	240059	61938.3	68805.1	73794.8	4708.91	234990	0	0
Lcariin	Flavonols	0	0	0	0	0	0	0	0
Quercetin	Flavonols	1596.65	2165.05	1819.22	1924.75	2235.18	2705.3	3598.02	6303.92
Myricetin	Flavonols	239.448	278.835	192.098	246.955	422.53	340.275	679.01	374.314
Rhamnetin	Flavonols	2.07692	1.69379	1.95176	1.66974	1.47688	1.60334	1.55465	1.43961
Isorhamnetin	Flavonols	3.17949	2.34757	2.09412	2.77014	6.44862	11.3045	7.36634	29.0784
Morin	Flavonols	1688.95	2145.63	1863.53	1933.6	2169.96	2821.22	3752.48	6347.06
Daidzein	Isoflavones	0	0	0	0	0	0	0	0
Genistein	Isoflavones	0	0	0	0	0	0	0	0
Calycosin	Isoflavones	0	0	0	0	0	0	0	0
Daidzin	Isoflavones	0	0	0	0	0	0	0	0
Ononin	Isoflavones	0	0	0	0	0	0	0	0
Formononetin	Isoflavones	0.44722	0.454898	0.441965	0.436186	0.363534	0	0	0
6-Hydroxydaidzein	Isoflavones	4.30433	0	8.67009	0	0	0	0	0
Biochanin A	Isoflavones	1.30008	0	0	0	0	0	0	0
6-Methoxyflavone	Flavones	0.744184	0.624178	0.50776	0.639113	0	0	0	0
Nobiletin	Flavones	0.21394	0	0	0	0	0.71854	0.644968	0
Chrysin；5,7-Dihydroxyflavone	Flavones	3.22823	7.95993	7.32829	5.9654	7.13492	7.81899	3.08882	9.76781
Galangin，Norizalpinin	Flavones	0	0	0	0	0	17.8505	0	12.5332
Baicalein	Flavones	0	0	25.5953	17.9175	0	0	0	0
Apigenin	Flavones	16.2104	12.8352	0	13.3881	0	12.5476	0	13.3686
Luteolin	Flavones	103.469	193.654	178.986	158.238	235.751	165.471	202.492	326.509
jaceosidin	Flavones	1.46192	0	0	0	0	0	0	0
Vitexin	Flavones	42.1683	4.91319	0	4.93029	285.115	155.425	513.345	326.341
Isoorientin	Flavones	15.0419	0	0	0	42.57	52.8198	95.8728	46.7387
Orientin	Flavones	53.0907	39.4789	16.5063	67.7042	139.637	90.1843	153.768	170.33
Apiin	Flavones	0	0	0	0	0	0	0	0
diosmin	Flavones	0	0	0	0	0	0	0	0
4',7-Di-O-methylnaringenin	Flavanones	0	0	0	0	0	0	0	0
Hesperetin	Flavanones	0	0	0	0	0	0	0	0
(S)-Pinocembrin	Flavanones	4.86211	12.0968	12.3498	8.14008	6.33925	11.0787	3.38123	19.0691
(2S)-Liquiritigenin	Flavanones	0	0	0	0	0	0	0	0
Isoliquiritigenin	Flavanones	1.1261	1.5369	1.32021	1.70384	0.455299	0.454359	0.414641	0.328768
Butein	Flavanones	0	0	0	0	0	0	0	0
Naringenin	Flavanones	74.0471	207.207	209.513	232.618	56.3479	63.5843	55.6604	168.295
Sakuranetin	Flavanones	1.31945	1.19535	1.28371	1.21074	0.9887	1.08901	0	0.854768
Isosakuranetin	Flavanones	0.296326	0.917944	0.6552	0.764298	0.392945	0.494962	0	0.618974
Eriodictyol	Flavanones	42.3409	48.2478	55.3853	65.2722	117.381	172.841	170.231	305.141
Prunin	Flavanones	44392.8	43156	45003	44984.9	63955.1	56836.1	64811.3	59970.3
Naringin	Flavanones	0	0	0	0	0	0	0	0
Hesperidin	Flavanones	0	0	0	0	0	0	0	0
Delphinidin 3-glucoside	Anthocyanins	175580	176193	188111	212808	22829.2	44422.8	38625.4	23347.2
Pelargonidin-3-glucoside	Anthocyanins	9.51705	18.465	13.4486	9.74925	12.4873	5.53817	10.5341	7.41744
Cyanidin 3-O-rutinoside chloride	Anthocyanins	39313.9	15892.1	10774.3	12374.5	249.322	63589.8	238.297	152.211
Cyanin chloride	Anthocyanins	0	0	0	0	0	0	0	0
Malvin	Anthocyanins	0	0	0	0	0	13.3699	0	0
(±)-Gallocatechin	Catechin derivatives	309757	335343	312619	315668	82859.4	108517	97094.8	59807.4
3,4-Dihydroxybenzaldehyde	Catechin derivatives	577.373	121.937	98.687	94.098	502.114	478.77	617.755	148.349
Protocatechuic acid	Catechin derivatives	208.401	387.308	198.272	234.906	393.809	225.486	441.995	319.837
Catechin	Catechin derivatives	44509.6	29439	34851.4	22458.1	9995.26	13489.3	15557.7	10888.9
Epicatechin	Catechin derivatives	627359	560671	501353	525090	351118	396321	415553	338513
(-)-Epicatechin 3-O-gallate	Catechin derivatives	47.0672	31.8089	26.2211	40.1524	69.3447	80.8491	80.2477	69.1787
(-)-Catechin 3-O-gallate	Catechin derivatives	0	0	0	0	0	0	0	0
(-)-Gallocatechin gallate	Catechin derivatives	0	153.982	152.797	159.012	0	0	157.196	0
Epigallocatechin gallate	Catechin derivatives	3.14793	10.0291	2.3098	2.21022	0	37.8389	0	0.630588
(-)-Epigallocatechin	Catechin derivatives	231164	205825	222549	233399	199802	204322	236238	176235
Proanthocyanidin A2	Proanthocyanidins	563.713	559.276	486.826	616.096	117.486	270.327	101.244	106.41
Procyanidin B1	Proanthocyanidins	46848.3	41267.4	30070.6	37104.5	3111.67	5172.91	5328.65	2882.49
Procyanidin B3	Proanthocyanidins	2889.5	2632.22	1704.89	1971.34	123.175	900.457	519.636	181.051
Procyanidin B2	Proanthocyanidins	745274	766171	572996	607802	175824	217703	235572	144415
Phloretin	Dihydrochalcones	47.08	170.508	108.479	137.791	6.76937	13.8442	10.4347	19.5634
Trilobatin	Dihydrochalcones	1079.14	1195.42	1167.78	1399.82	120.683	114.475	129.988	86.3367
Phlorizin	Dihydrochalcones	27966.8	34020.9	39651.5	42052	2371.44	2967.5	2687.47	1893.15
