# Supplementary material for: Total Flavonoids Extracts of Apocynum L. from the Ili River Valley Region at Different Harvesting Periods and Bioactivity Analysis
Source: Molecules. 2022 Oct 28;27(21):7343. doi: 10.3390/molecules27217343 (PMC9655940; doi:10.3390/molecules27217343)
Supplement: Supplementary file 1 [file molecules-27-07343-s001.zip › Supplementary Table S2. KEGG enrichment analysis of differential metabolites between Apocynum venetum and Apocynum hendersonii.xlsx]

## Sheet: Sheet1
Supplementary Table S2. KEGG enrichment analysis of differential metabolites between Apocynum venetum and Apocynum hendersonii
ID Annotation	Annotation	in set	set	in background	background	RichFactor	p-value	-lg(p-value)	FDR correction	Matching IDs	URL
ath00941	Flavonoid biosynthesis	5	12	74	3703	0.0675676	1.9759e-06	5.70424	2.37108e-05	C00774 C01604 C05631 C06562 C08650	https://www.genome.jp/kegg-bin/show_pathway?ath00941/ath:C00774%09blue/ath:C01604%09blue/ath:C05631%09red/ath:C06562%09blue/ath:C08650%09blue
ath00130	Ubiquinone and other terpenoid-quinone biosynthesis	2	12	71	3703	0.028169	0.0211317	1.67507	0.108243	C00156 C00811	https://www.genome.jp/kegg-bin/show_pathway?ath00130/ath:C00156%09red/ath:C00811%09blue
ath00998	Biosynthesis of various secondary metabolites - part 2	2	12	81	3703	0.0246914	0.0270608	1.56766	0.108243	C00755 C00811	https://www.genome.jp/kegg-bin/show_pathway?ath00998/ath:C00755%09red/ath:C00811%09blue
ath00010	Glycolysis / Gluconeogenesis	1	12	31	3703	0.0322581	0.0960966	1.01729	0.239617	C01451	https://www.genome.jp/kegg-bin/show_pathway?ath00010/ath:C01451%09red
ath00944	Flavone and flavonol biosynthesis	1	12	51	3703	0.0196078	0.153521	0.813833	0.239617	C04608	https://www.genome.jp/kegg-bin/show_pathway?ath00944/ath:C04608%09red
ath00790	Folate biosynthesis	1	12	58	3703	0.0172414	0.172815	0.762417	0.239617	C00156	https://www.genome.jp/kegg-bin/show_pathway?ath00790/ath:C00156%09red
ath00902	Monoterpenoid biosynthesis	1	12	59	3703	0.0169492	0.175539	0.755627	0.239617	C02452	https://www.genome.jp/kegg-bin/show_pathway?ath00902/ath:C02452%09red
ath00903	Limonene and pinene degradation	1	12	64	3703	0.015625	0.189032	0.723465	0.239617	C02452	https://www.genome.jp/kegg-bin/show_pathway?ath00903/ath:C02452%09red
ath00942	Anthocyanin biosynthesis	1	12	66	3703	0.0151515	0.194372	0.711365	0.239617	C12138	https://www.genome.jp/kegg-bin/show_pathway?ath00942/ath:C12138%09blue
ath00940	Phenylpropanoid biosynthesis	1	12	68	3703	0.0147059	0.199681	0.699664	0.239617	C00811	https://www.genome.jp/kegg-bin/show_pathway?ath00940/ath:C00811%09blue
ath00350	Tyrosine metabolism	1	12	78	3703	0.0128205	0.225744	0.646384	0.246266	C00811	https://www.genome.jp/kegg-bin/show_pathway?ath00350/ath:C00811%09blue
ath00950	Isoquinoline alkaloid biosynthesis	1	12	122	3703	0.00819672	0.331436	0.4796	0.331436	C00811	https://www.genome.jp/kegg-bin/show_pathway?ath00950/ath:C00811%09blue
